# Supplementary material
Source: PubMed Central journal article supplement (PMC9274772)

## SUPPORTING INFORMATION

### Targeting Triple-negative Breast Cancer by a Novel Proteolysis

### Targeting Chimera (PROTAC) Degradator of Enhancer of Zeste

### Homolog 2 (EZH2)

Brandon Dale<sup>†,#</sup>, Chris Anderson<sup>†,#</sup>, Kwang-Su Park<sup>†</sup>, H. Ümit Kaniskan<sup>†</sup>, Anqi Ma<sup>†</sup>, Yudao Shen<sup>†</sup>, Chengwei Zhang<sup>†</sup>, Ling Xie<sup>‡</sup>, Xian Chen<sup>‡</sup>, Xufen Yu<sup>†,\*</sup>, Jian Jin<sup>†,\*</sup>

<sup>†</sup>Mount Sinai Center for Therapeutics Discovery, Departments of Pharmacological Sciences, Oncological Sciences and Neuroscience, Tisch Cancer Institute, Icahn School of Medicine at Mount Sinai, New York, NY 10029, United States

<sup>‡</sup>Department of Biochemistry and Biophysics, University of North Carolina at Chapel Hill, Chapel Hill, NC 27599, United States

<sup>#</sup>These authors contributed equally to this work.

#### Corresponding Authors

\*E-mail: [xufen.yu@mssm.edu](mailto:xufen.yu@mssm.edu) (X.Y.).

\*E-mail: [jian.jin@mssm.edu](mailto:jian.jin@mssm.edu) (J.J.).

#### Table of Contents

|                                                                                                                                        |    |
|----------------------------------------------------------------------------------------------------------------------------------------|----|
| 1. Figure S1. The effect of <b>16</b> on reducing the EZH1 protein level in SUM159 cells.                                              | S3 |
| 2. Figure S2. EPZ-6438 reduces the H3K27me3 mark in MDA-MB-453 cells.                                                                  | S4 |
| 3. Figure S3. The EZH2 degradation induced by compound <b>16</b> is rescued by the NEDD8 activating E1 enzyme (NAE) inhibitor MLN4924. | S5 |
| 4. Figure S4. Compound <b>16</b> inhibits the growth of MDA-MB-453 cells.                                                              | S6 |

|                                                                                                                    |     |
|--------------------------------------------------------------------------------------------------------------------|-----|
| 5. Figure S5. Compound <b>16</b> displays superior growth inhibition and EZH2 degradation to MS177 in BT549 cells. | S7  |
| 6. <sup>1</sup> H NMR spectrum of compound <b>16</b> .                                                             | S8  |
| 7. <sup>13</sup> C NMR spectrum of compound <b>16</b> .                                                            | S9  |
| 8. HPLC-HRMS spectrum of compound <b>16</b> .                                                                      | S10 |
| 9. <sup>1</sup> H NMR spectrum of compound <b>17</b> .                                                             | S11 |
| 10. <sup>13</sup> C NMR spectrum of compound <b>17</b> .                                                           | S12 |
| 11. HPLC-HRMS spectrum of compound <b>17</b> .                                                                     | S13 |

1. **Figure S1.** The effect of **16** on reducing the EZH1 protein level in SUM159 cells. SUM159 cells were treated with DMSO or **16** at the indicated concentration for 48 h. The cell lysates were analyzed by western blotting to examine the EZH1 protein level.  $\beta$ -Actin was used as the loading control. Results shown are representative of at least two independent experiments.

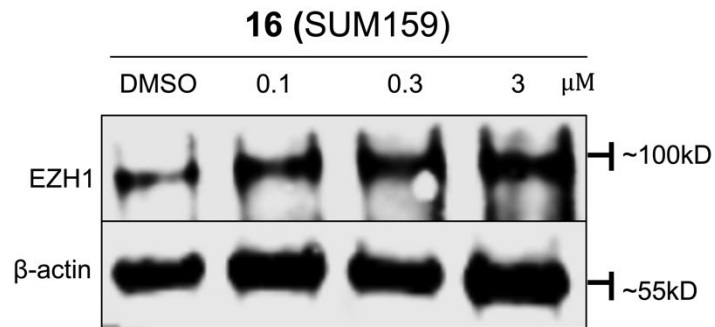

2. **Figure S2.** EPZ-6438 effectively reduces the H3K27me3 in MDA-MB-453 cells. MDA-MB-453 cells were treated with DMSO or EPZ-6438 at indicated concentrations for 48 h. Cells were harvested and the H3K27me3 protein level was assessed by western blotting.  $\beta$ -Actin was utilized as the loading control. Results are representative of at least two independent experiments.

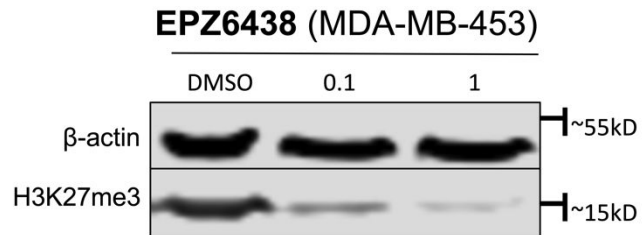

3. **Figure S3.** The EZH2 degradation induced by compound **16** is rescued by NEDD8 activating E1 enzyme (NAE) inhibitor MLN4924. (A-C) MDA-MB-453 cells were pretreated with MLN4924 (0.5  $\mu$ M) for 30 min and then co-incubated with compound **16** (1  $\mu$ M) for 24 h. The EZH2 protein level was determined by western blot analysis. H3 was used as the loading control. (D) Quantification of western blot replicates A-C and Figure 7C.

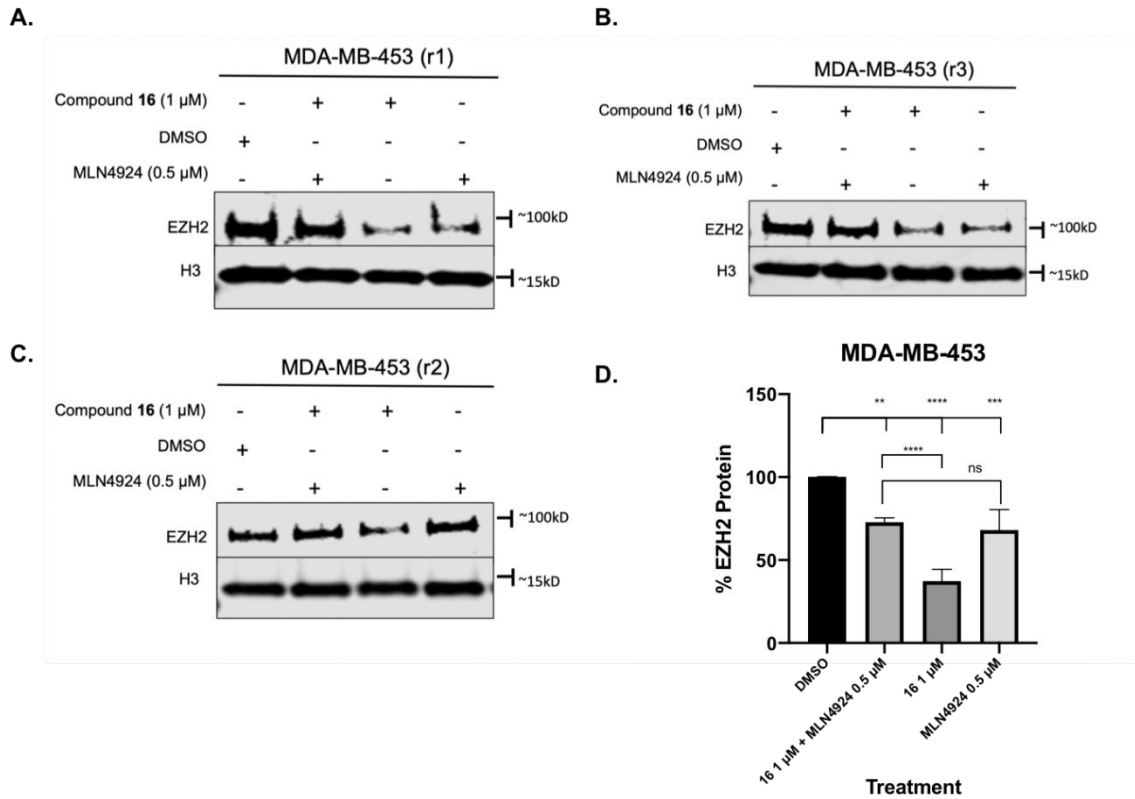

4. **Figure S4.** Compound **16** inhibits the growth of MDA-MB-453 cells. MDA-MB-453 cells were treated with serial dilution (from 3.2 to 0.6  $\mu\text{M}$ , with 1.1-fold dilution, 14 points) of **16** for 5 days. Cell viability was determined using a WST-8 assay.  $\text{GI}_{50}$  result shown is the mean values  $\pm$  SD from three independent experiments.

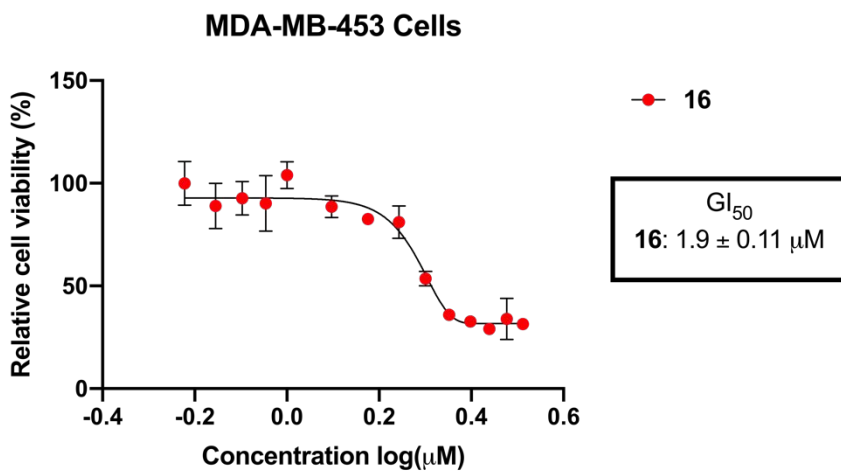

5. **Figure S5.** Compound **16** displays superior growth inhibition and EZH2 degradation to MS177 in BT549 cells. (A) BT549 cells were treated with MS177 or **16** for 5 d and then evaluated for cellular growth inhibition utilizing the WST-8 assay. Results shown are the mean values  $\pm$  SD from three independent experiments. BT549 cells were treated with **16** (B) or MS177 (C) for 48 h at indicated concentrations and then analyzed by western blotting to assess for the EZH2 protein level.  $\beta$ -Actin was used as the loading control. Results shown are representative of two independent experiments.

**A**

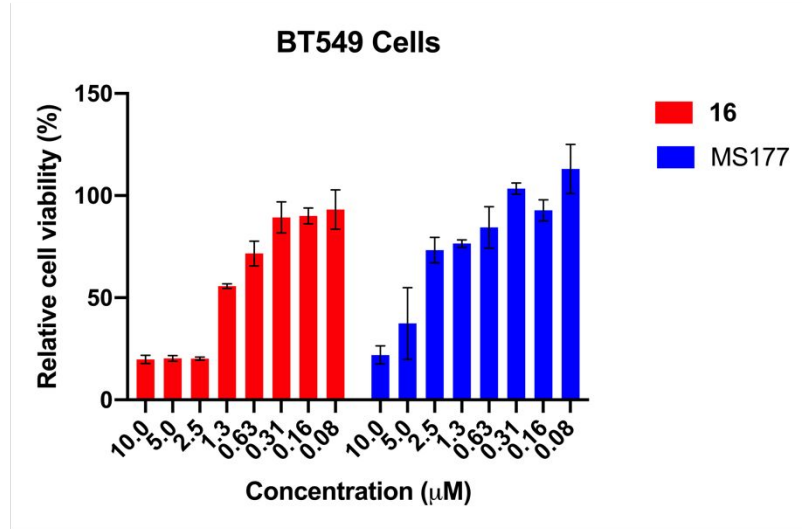

**B**

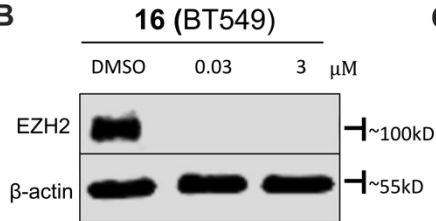

**C**

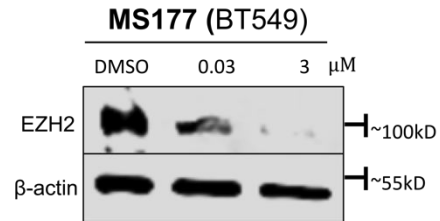

## 6. <sup>1</sup>H NMR spectrum of compound 16.

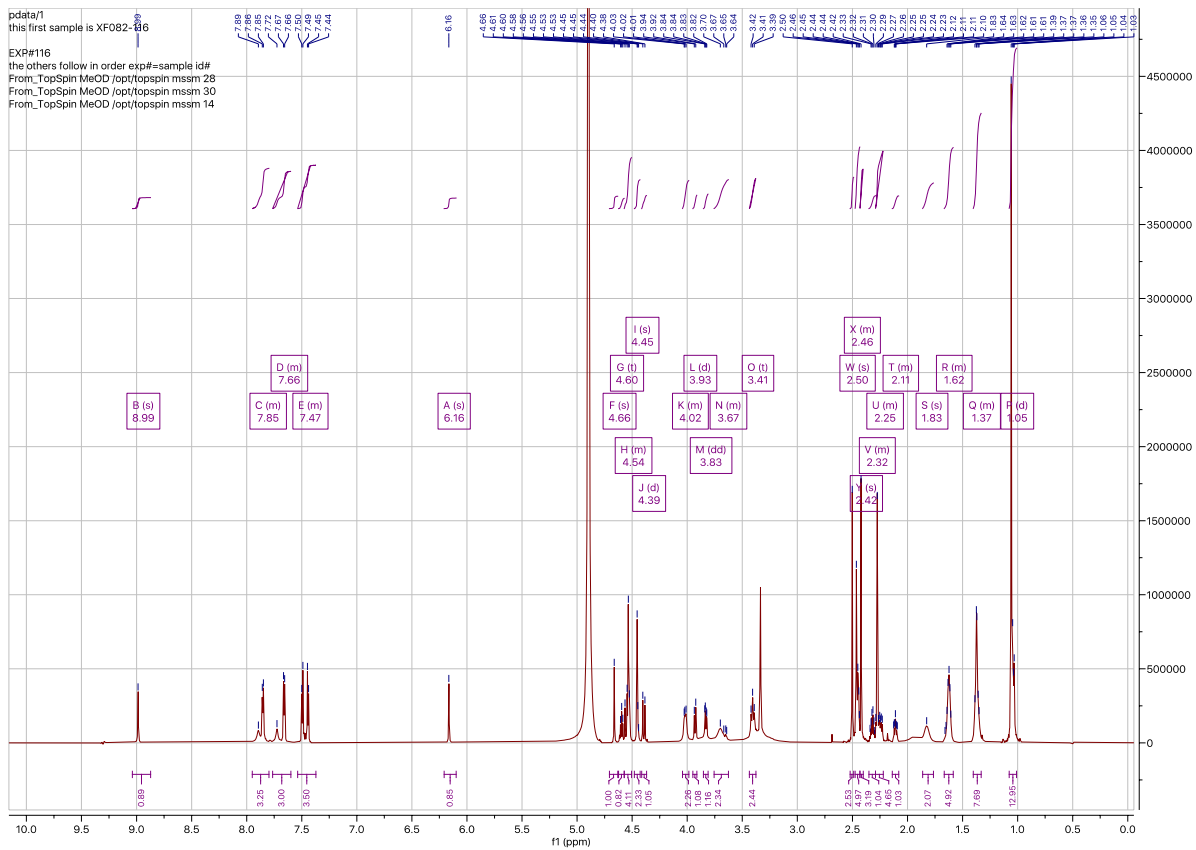



7.  $^{13}\text{C}$  NMR spectrum of compound 16.

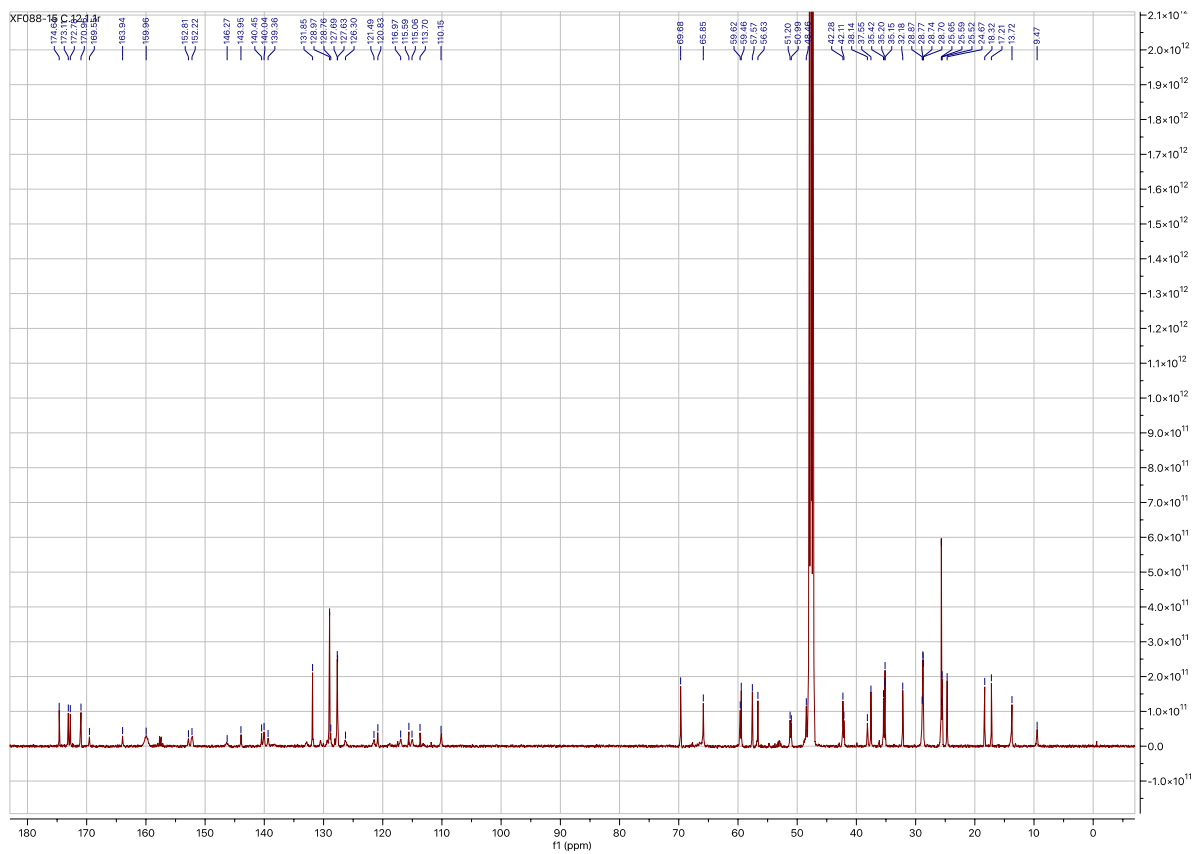

8. HPLC-HRMS spectrum of compound **16**.

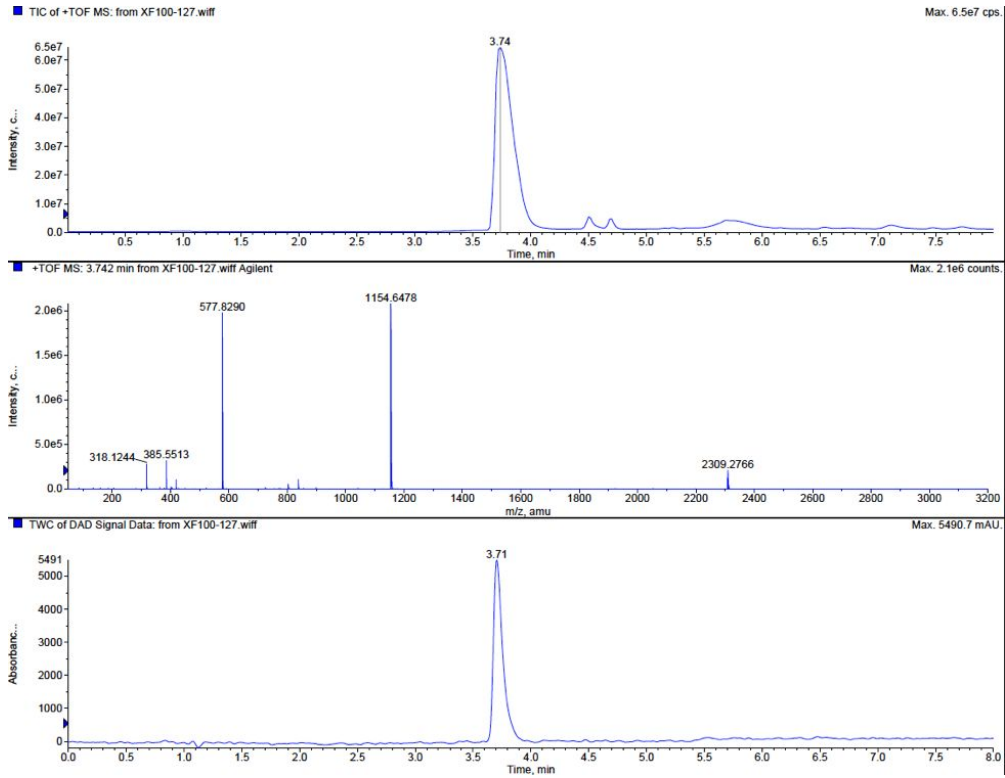

9. <sup>1</sup>H NMR spectrum of compound **17**.

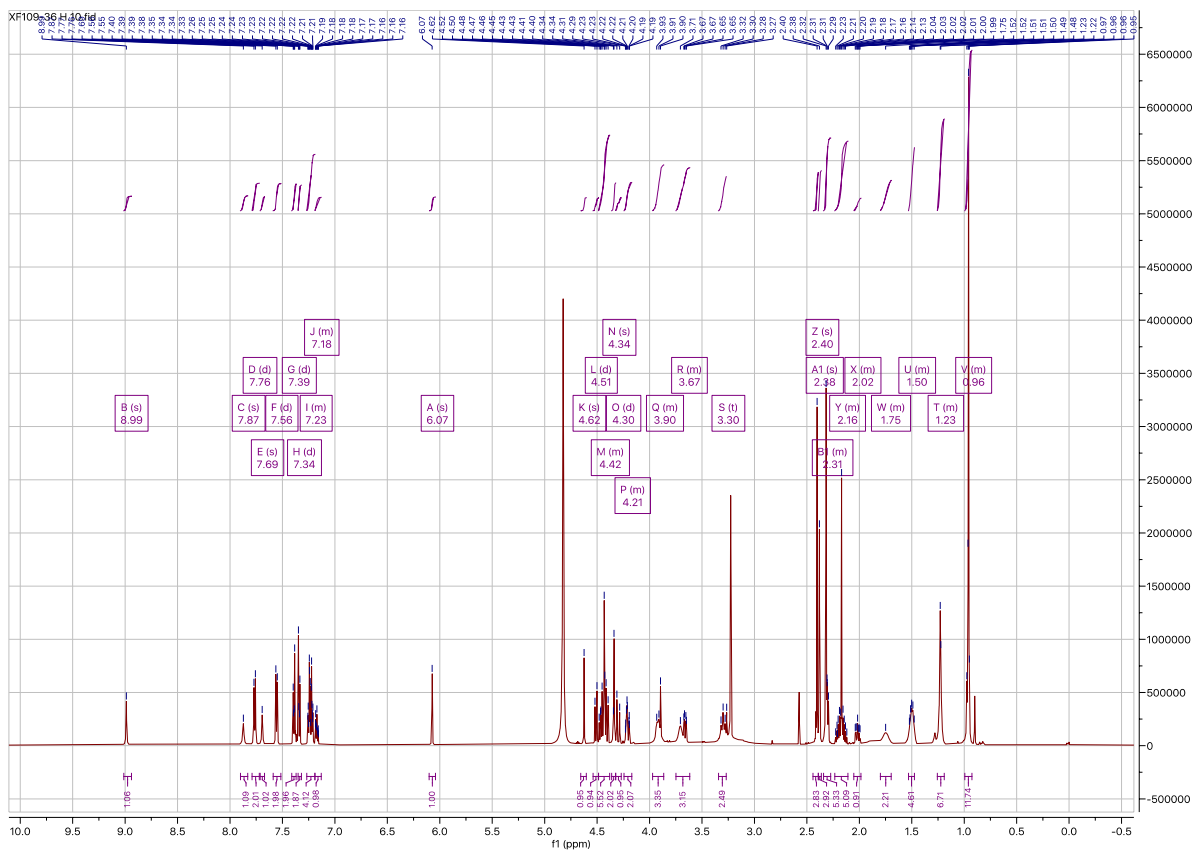

10. <sup>13</sup>C NMR spectrum of compound 17.

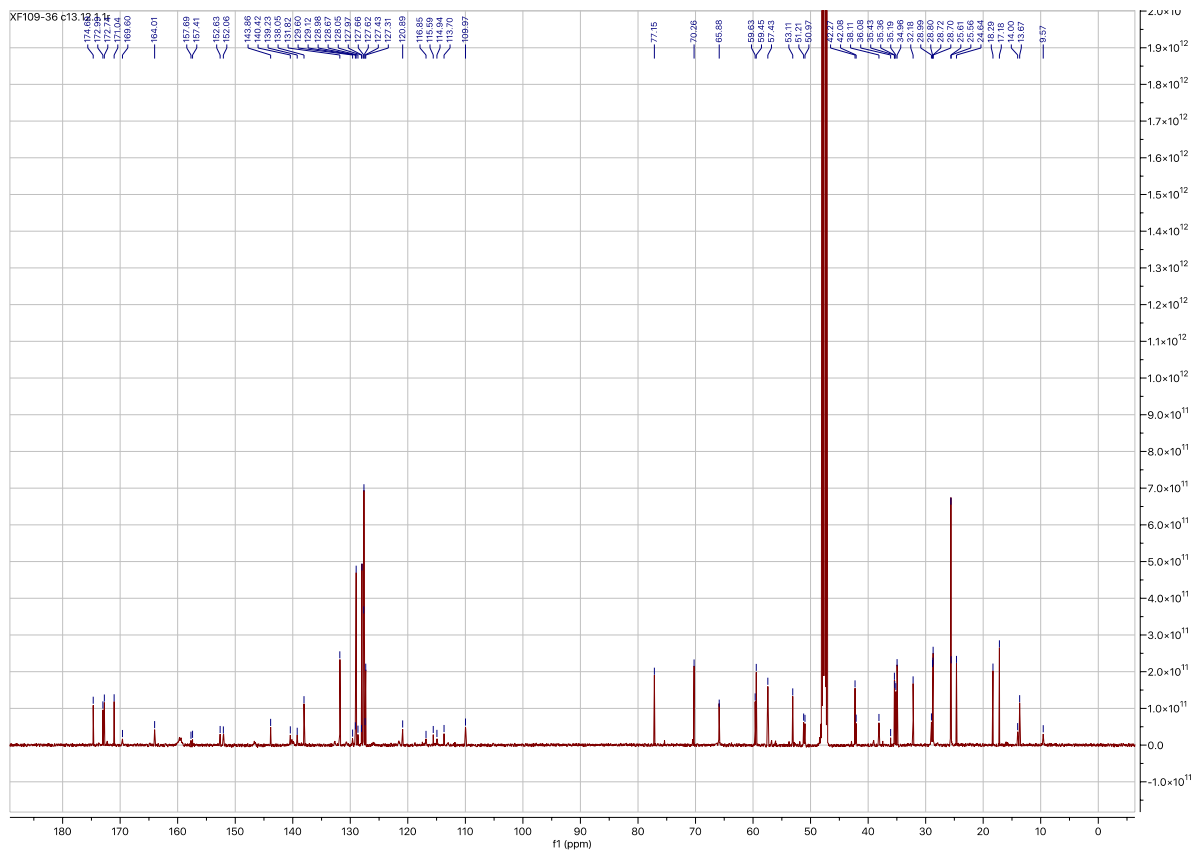

# 11. HPLC-HRMS spectrum of compound 17.

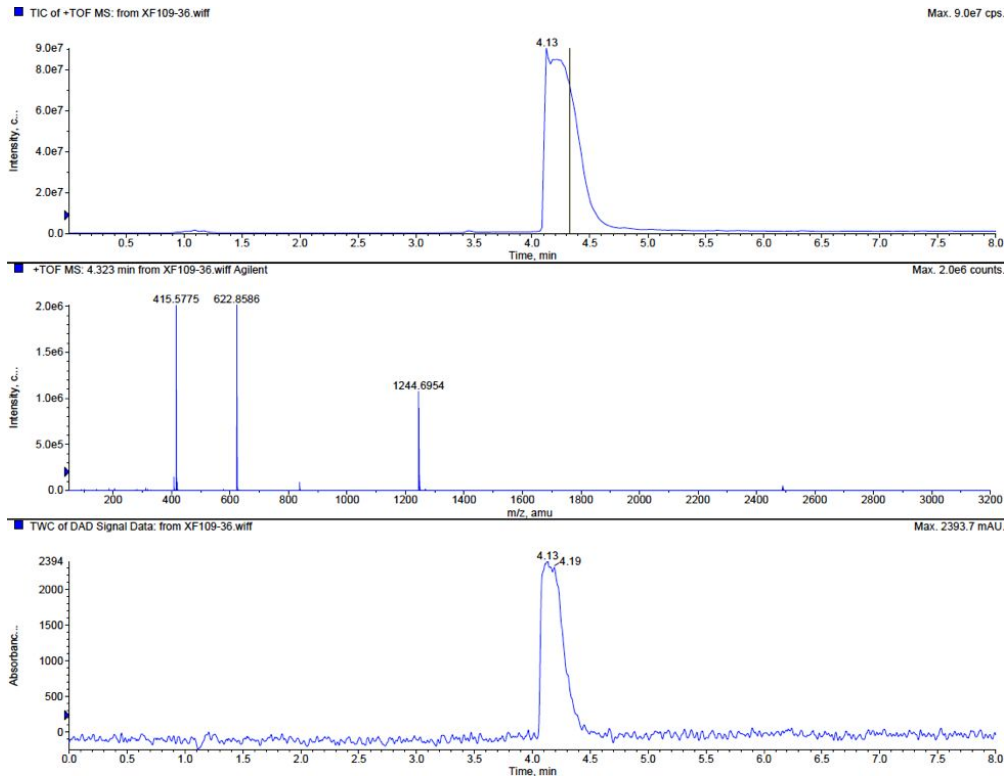

Supplement: pt2c00100_si_001.pdf [file pt2c00100_si_001.pdf]
